# Supplementary material
Source: PubMed Central journal article supplement (PMC58747)
Supplement: pnas_201394698_1.pdf [file pnas_201394698_1.pdf]

Supporting information for Schübeler *et al.* (September 11, 2001) *Proc. Natl. Acad. Sci. USA*, 10.1073/pnas.201394698.

**Table 1. Primer sequence and product sizes of amplicons**

1. 5'LCRb (3 + 4) (319 bp). 3: CAGTATAGTTCCTAGTAATGAG; 4:  
ATAAGCCAAAATTCCTGCTCC
2. 5'LCRa (1 + 2) (330 bp). 1: TCCCTTTCTGAGTCCTAATC; 2:  
AACTTGCTTGACCATCTATGG
3. HS2 (1 + 2) (321 bp). 1: TACACATTAACGAGCCTCTGC; 2:  
GTGGACTTCCTCCTAGAGAC
4. mLCR (1 + 2) (357 bp). 1: TGTAATCTAGCACAGAACCTTAG; 2:  
TCTTTCATGGATGGTAACTAGTG
5. 3'LCR (1 + 2) (387 bp). 1: CTCTGGACTCTAGCTGCATATG; 2:  
CAAAAGCCATACTGATGTGCAG
6. 5'Ey (3 + 4) (377 bp). 3: GCACATGGATGCAGTTAAACAC; 4:  
GAGTGACAGTGTAGAGAAGATG.
7. bH0Pr (3 + 4) (364 bp). 3: TCTTGACCAATAGCCTCAGAG; 4:  
GGTAAGGGGTCATAACATTGG
8. 5'bH1 (1 + 2) (366 bp). 1: CATAACATAGCTGGTTCTTGTTTC; 2:  
GATAAGTGTAGCTGCCTGGTG
9. bH1Pr (3 + 4) (285 bp). 3: CTGTGATAGTGCATGTGGGTG; 4:  
GAAGTCTGTTTACATGACAAC

10. bmp (1 + 2) (319 bp). 1: GAGACAGTGTCTCTGCACAGA; 2:  
AGACAGCAGCCTTCTCAGCATC

11. 3'bmaj (1 + 2) (369 bp). 1: CAGTAAGCCACAGATCCTATTG; 2:  
CCCATAGTGACTATTGACTGTG

12. 3'bm(I) (1 + 2) (391 bp). 1: CCACCATTTCTCTATGAATGC; 2:  
GTCAACTGATGTAGGCACTATGG

13. bminPr (1 + 2) (353 bp). 1: CAGACAAGCTATGTTATTGGTG; 2:  
GTCAGGTGCACCATGATGTCTG

14. 3'HS 1 (1 + 2) (325 bp). 1: CTAACTCACGTGCATTGGTAGC; 2:  
ACTCTAGGCAGTCTCAGGTTGTC

Mouse amylase 2.1y gene: Primer pair amylase 4 + 5 yields a 348-bp product, and primer  
pair 4 + 6 yields a 401-bp product. 4: TCAGTTGTAATTCTCCTTGTACGG; 5:  
CCTCCCATCTGAAGTATGTGGGTC; 6: CATTCTTGGCAATATCAACC
